# Supplementary material for: Irrigation and Fertilization: A Comprehensive Analysis of Their Influences on Qualitative Indices in Two Plum Varieties
Source: MDPI journal article supplement (doi:10.3390/su16062496), 2024-03-18
Supplement: s1 [file s1]

**Table S1.** Analysis of variance regarding the effect of cultivar, irrigation, and fertilization on stem diameter

| Source of Variation                   | SS     | DF  | MS    | F value |
|---------------------------------------|--------|-----|-------|---------|
| Entire                                | 684.12 | 159 |       |         |
| Repetitions                           | 6.55   | 4   | 1.64  | 1.24    |
| Irrigation                            | 126.46 | 3   | 42.15 | 31.99** |
| Irrigare error                        | 15.82  | 12  | 1.32  |         |
| Cultivar                              | 10.53  | 1   | 10.53 | 8.71**  |
| Irrigation x Cultivar                 | 21.66  | 3   | 7.22  | 5.97**  |
| Cultivar error                        | 19.34  | 16  | 1.21  |         |
| Fertilization                         | 233.99 | 3   | 78.00 | 53.37** |
| Irrigation x Fertilization            | 35.68  | 9   | 3.96  | 2.71**  |
| Cultivar x Fertilization              | 34.13  | 3   | 11.38 | 7.78**  |
| Irrigation x Cultivar x Fertilization | 39.66  | 9   | 4.41  | 3.01**  |
| Fertilization error                   | 140.30 | 96  | 1.46  |         |

\* Significant at  $p < 0.05$ ; \*\* Significant at  $p < 0.01$
